# Supplementary material for: Diversity and Metabolic Activity of Fungi Causing Biodeterioration of Canvas Paintings
Source: MDPI journal article supplement (doi:10.3390/jof8060589), 2022-05-30
Supplement: s1 [file s1]

Table S1. Primers used for fungal identification.

| Primer    | Sequence (5'-3')         | Reference |
|-----------|--------------------------|-----------|
| ITS1F     | CTTGGTCATTTAGAGGAAGTAA   | [24]      |
| ITS4      | TCCTCCGCTTATTGATATGC     | [25]      |
| EF1-1018F | GAYTTCATCAAGAACATGAT     | [26]      |
| EF1-1620R | GACGTTGAADCCRACRTTGTC    |           |
| Bt2a      | GGTAACCAAATCGGTGCTGCTTTC | [27]      |
| Bt2b      | ACCCTCAGTGTAGTGACCCTTGGC |           |

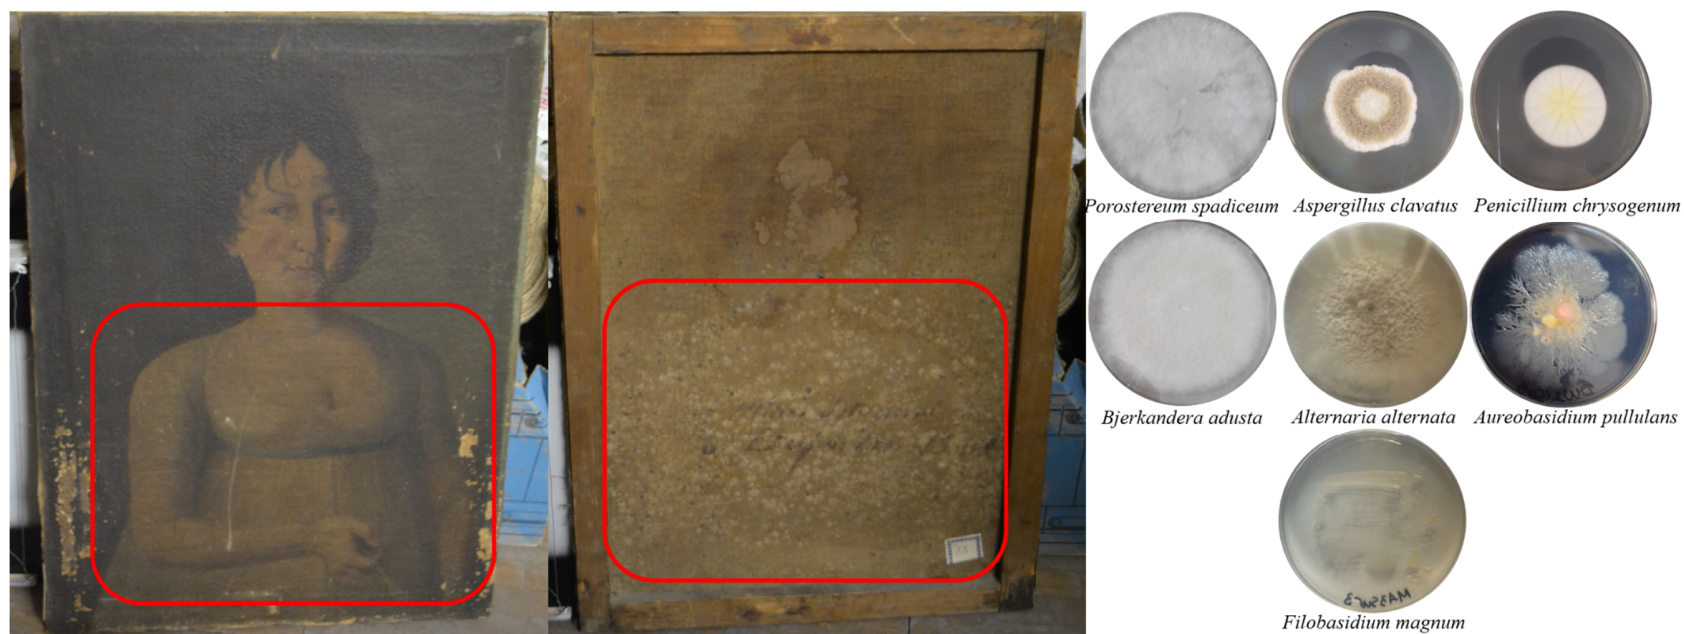

Figure S1. Oil on canvas painting MA3355, in the repository of The Art Museum, Cluj-Napoca, Romania, with red rectangles indicating the sampling areas and fungal isolates inhabiting the reverse of the support.

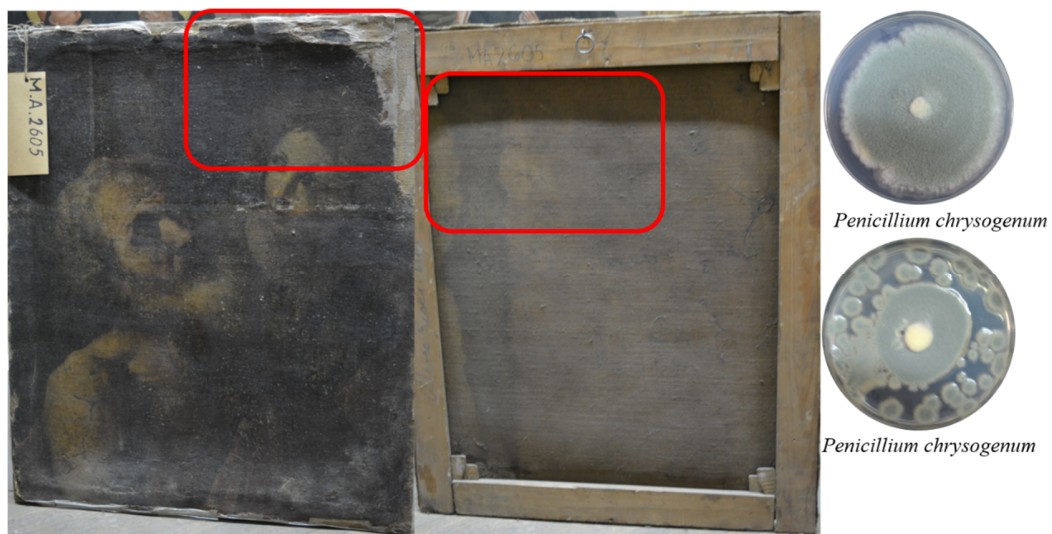

Figure S2. Oil on canvas painting MA2605, in the repository of The Art Museum, Cluj-Napoca, Romania, with red rectangles indicating the sampling areas and fungal isolates inhabiting the reverse of the support.

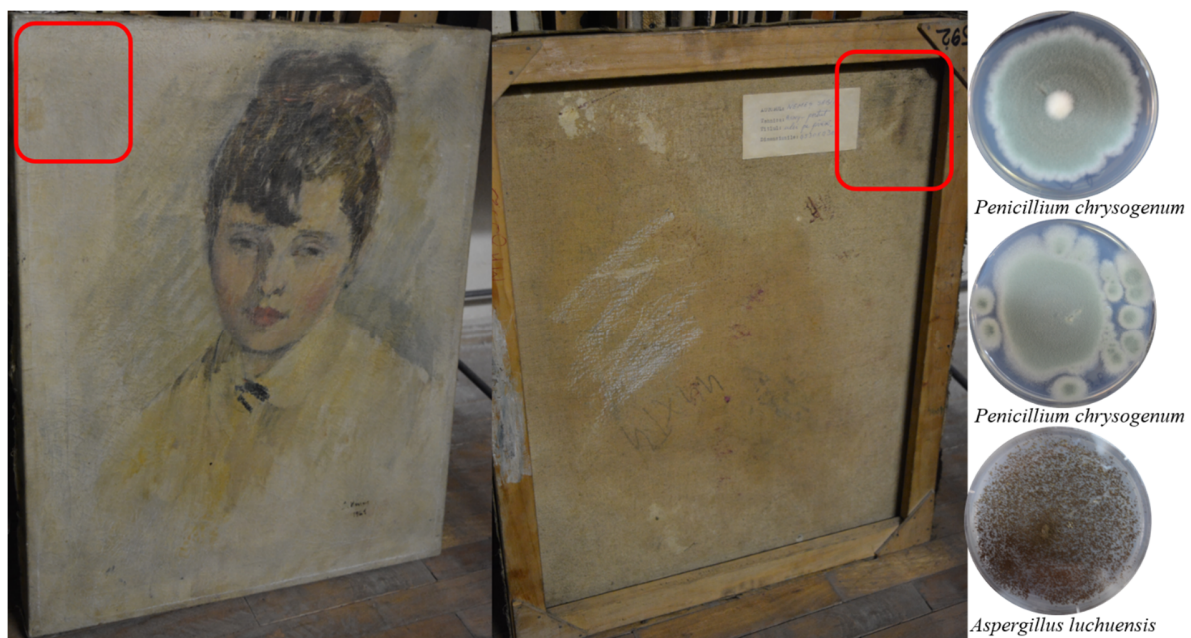

Figure S3. Oil on canvas painting MA8592, in the repository of The Art Museum, Cluj-Napoca, Romania, with red rectangles indicating the sampling areas and fungal isolates inhabiting the reverse of the support.

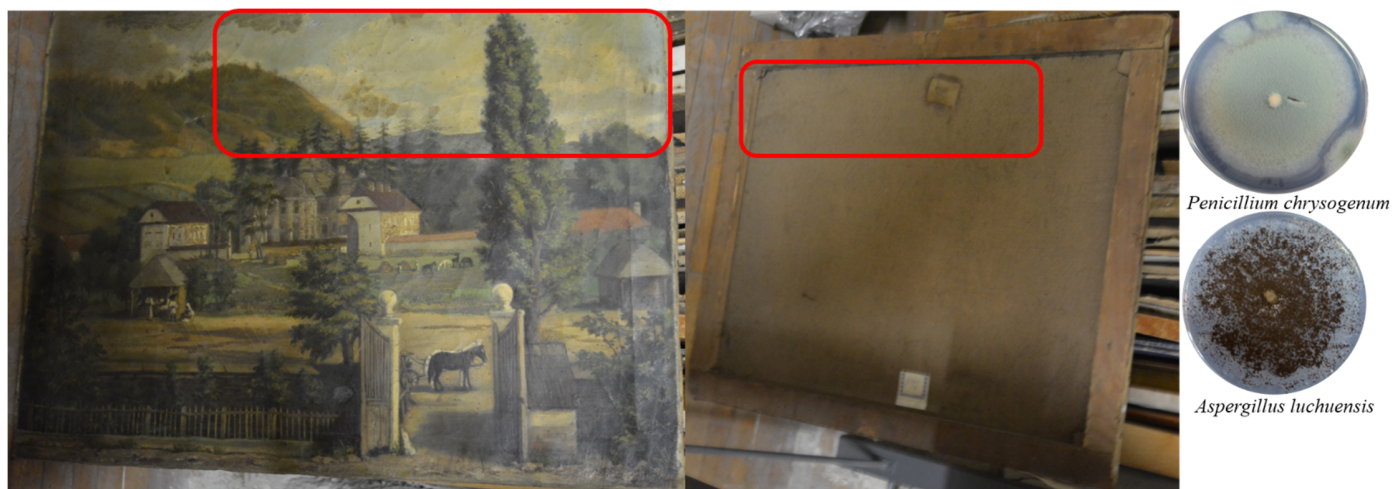

Figure S4. Oil on canvas painting MAFD261, in the repository of The Art Museum, Cluj-Napoca, Romania, with red rectangles indicating the sampling areas and fungal isolates inhabiting the reverse of the support.

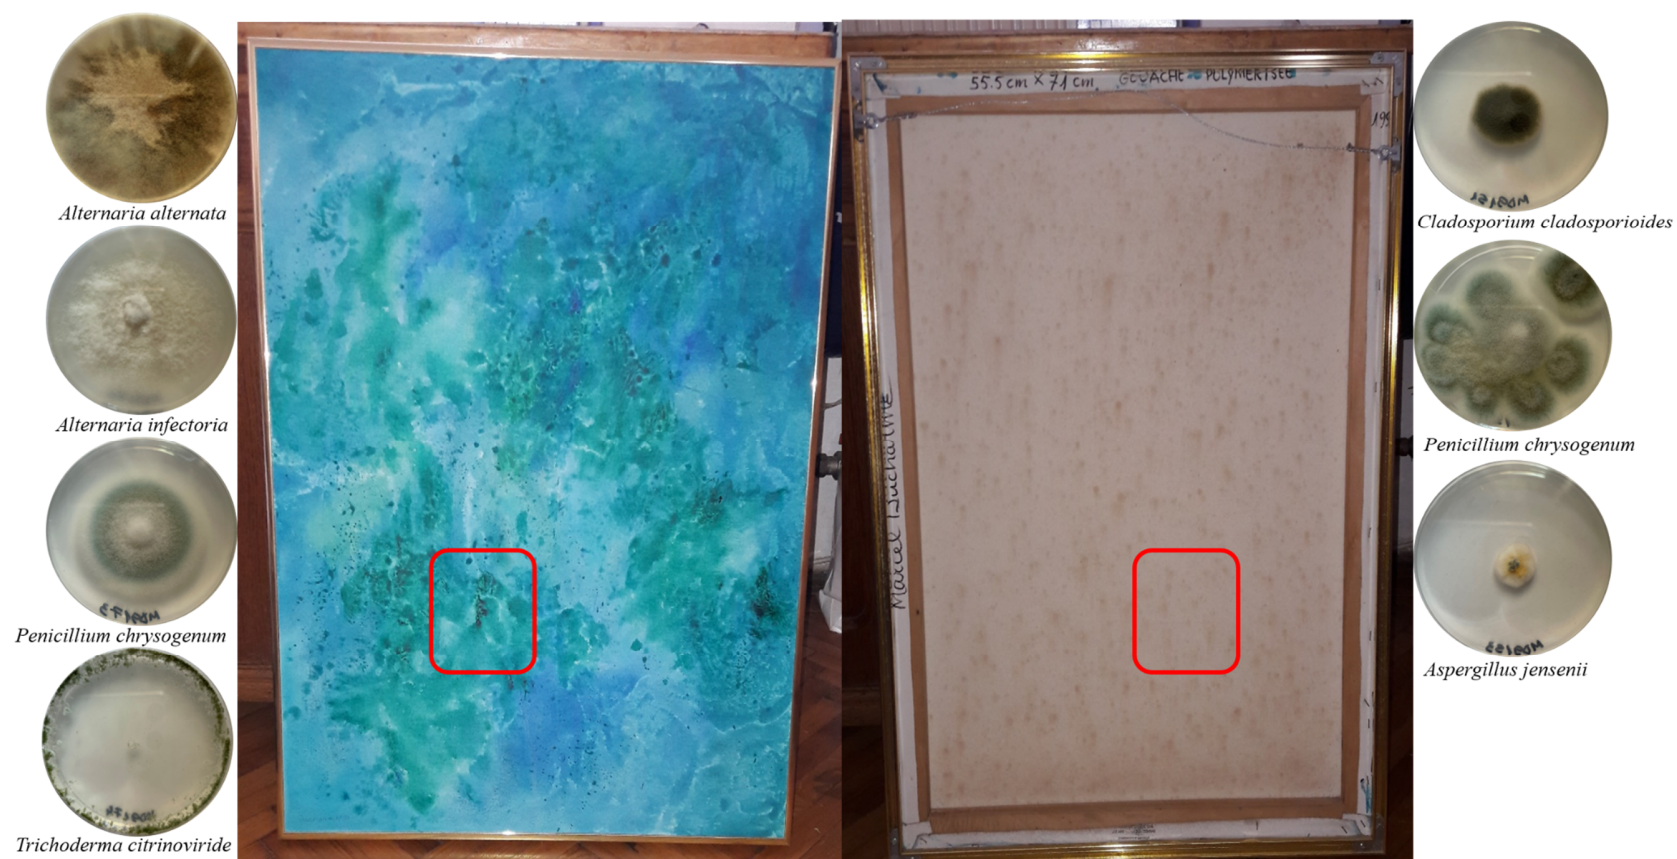

Figure S5. Gouache on canvas painting MD91, from a personal collection, Cluj-Napoca, Romania, with red rectangles indicating the sampling areas and fungal isolates inhabiting the observse (on the left) and the reverse (on the right) of the support.

Table S2. Identity of the isolated fungal species according to the blastn results of the amplified molecular markers.

| ID        | ITS                          |       |        | TEF                    |       |        | Bt2     |       |       |
|-----------|------------------------------|-------|--------|------------------------|-------|--------|---------|-------|-------|
|           | Species                      | I (%) | Qc (%) | Species                | I (%) | Qc (%) | Species | I (%) | Qc(%) |
| TeMATIC_A | <i>Porostereum spadiceum</i> | 100   | 99     | <i>Bjerkandera</i> sp. | 100   | 77     | *       |       |       |

|           |                                            |       |     |                                       |       |     |                                       |       |     |
|-----------|--------------------------------------------|-------|-----|---------------------------------------|-------|-----|---------------------------------------|-------|-----|
| TeMATIC_B | <i>Aspergillus clavatus</i>                | 99.13 | 99  | <b><i>Aspergillus clavatus</i></b>    | 99.83 | 99  | <i>Aspergillus clavatus</i>           | 99.82 | 99  |
| TeMATIC_C | <b><i>Penicillium chrysogenum</i></b>      | 99.59 | 100 | <i>Penicillium chrysogenum</i>        | 98.96 | 99  | <i>Penicillium chrysogenum</i>        | 99.84 | 99  |
| TeMATIC_E | <b><i>Bjerkandera adusta</i></b>           | 100   | 99  | <i>Bjerkandera</i> sp.                | 99.7  | 92  | *                                     |       |     |
| TeMATIC_F | <b><i>Alternaria alternata</i></b>         | 99.26 | 99  | <i>Alternaria maritima</i>            | 99    | 99  | *                                     |       |     |
| MA3Sw2    | <i>Aureobasidium pullulans</i>             | 97.2  | 96  | <b><i>Aureobasidium pullulans</i></b> | 99.35 | 99  | *                                     |       |     |
| MA3Sw3    | <b><i>Filobasidium magnum</i></b>          | 100   | 100 | *                                     |       |     | *                                     |       |     |
| IMAS1     | <b><i>Penicillium chrysogenum</i></b>      | 100   | 100 | <i>Penicillium rubens</i>             | 99.67 | 100 | <i>Penicillium chrysogenum</i>        | 99.79 | 100 |
| IMAS2     | <i>Penicillium commune</i>                 | 98.85 | 100 | <i>Penicillium rubens</i>             | 99.67 | 99  | <b><i>Penicillium chrysogenum</i></b> | 99.57 | 100 |
| IIMA3S1   | <i>Penicillium</i> sp.                     | 99.26 | 98  | <i>Penicillium chrysogenum</i>        | 99.53 | 100 | <b><i>Penicillium chrysogenum</i></b> | 100   | 100 |
| IIMA3S2   | <i>Penicillium</i> sp.                     | 99.44 | 100 | <i>Penicillium</i> sp.                | 99.51 | 100 | <b><i>Penicillium chrysogenum</i></b> | 100   | 100 |
| IIMA3S3   | <i>Aspergillus</i> sp.                     | 92.46 | 100 | <b><i>Aspergillus luchuensis</i></b>  | 99.66 | 99  | <i>Aspergillus</i> sp.                | 99.82 | 98  |
| IIMA5S1   | <i>Penicillium</i> sp.                     | 98.13 | 100 | <i>Penicillium chrysogenum</i>        | 99.36 | 99  | <b><i>Penicillium chrysogenum</i></b> | 100   | 99  |
| IIMA5S2   | <i>Aspergillus</i> sp.                     | 98.9  | 98  | <b><i>Aspergillus luchuensis</i></b>  | 99.38 | 100 | <i>Aspergillus</i> sp.                | 99.82 | 98  |
| MD91F1    | <b><i>Alternaria alternata</i></b>         | 99.8  | 100 | <i>Alternaria</i> sp.                 | 99.84 | 99  | *                                     |       |     |
| MD91F2    | <b><i>Alternaria infectoria</i></b>        | 99.81 | 99  | <i>Alternaria triticina</i>           | 99.65 | 100 | <i>Alternaria dianthicola</i>         | 98.78 | 98  |
| MD91F3    | <i>Penicillium chrysogenum</i>             | 98.91 | 100 | <i>Penicillium</i> sp.                | 99.19 | 98  | <b><i>Penicillium chrysogenum</i></b> | 99.78 | 98  |
| MD91F4    | <b><i>Trichoderma citrinoviride</i></b>    | 100   | 100 | <i>Trichoderma citrinoviride</i>      | 99.84 | 99  | *                                     |       |     |
| MD91S1    | <b><i>Cladosporium cladosporioides</i></b> | 100   | 100 | <i>Cladosporium oxysporum</i>         | 99.37 | 98  | <i>Aspergillus jensenii</i>           | 99.52 | 99  |
| MD91S2    | <i>Penicillium chrysogenum</i>             | 99.45 | 98  | <i>Penicillium chrysogenum</i>        | 99.05 | 99  | <b><i>Penicillium chrysogenum</i></b> | 100   | 100 |
| MD91S3    | <i>Aspergillus versicolor</i>              | 95.63 | 99  | <i>Aspergillus puulaauensis</i>       | 98.58 | 99  | <b><i>Aspergillus jensenii</i></b>    | 99.3  | 100 |

- Sample not intended for amplification.

Based on the highest identity (I%) and query cover (Qc%) scores, the corresponding sequences of the investigated markers were selected for species identification (marked in bold and deposited at ncbi, under accession numbers detailed in the Materials and Methods section).
